# Supplementary material for: Thermodynamics, Kinetics, and Mechanisms of the Co-Removal of Arsenate and Arsenite by Sepiolite-Supported Nanoscale Zero-Valent Iron in Aqueous Solution
Source: MDPI journal article supplement (doi:10.3390/ijerph191811401), 2022-09-10
Supplement: s1 [file s1]

## **Supplementary Materials**

**Figure numbers: 5**

**Table numbers: 2**

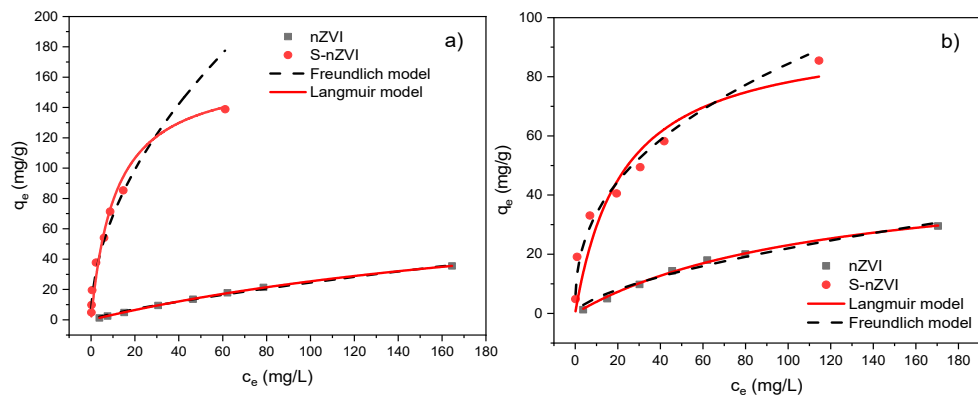

**Figure S1** Adsorption isotherms of a) As(III) and b) As(V) on nZVI and S-nZVI

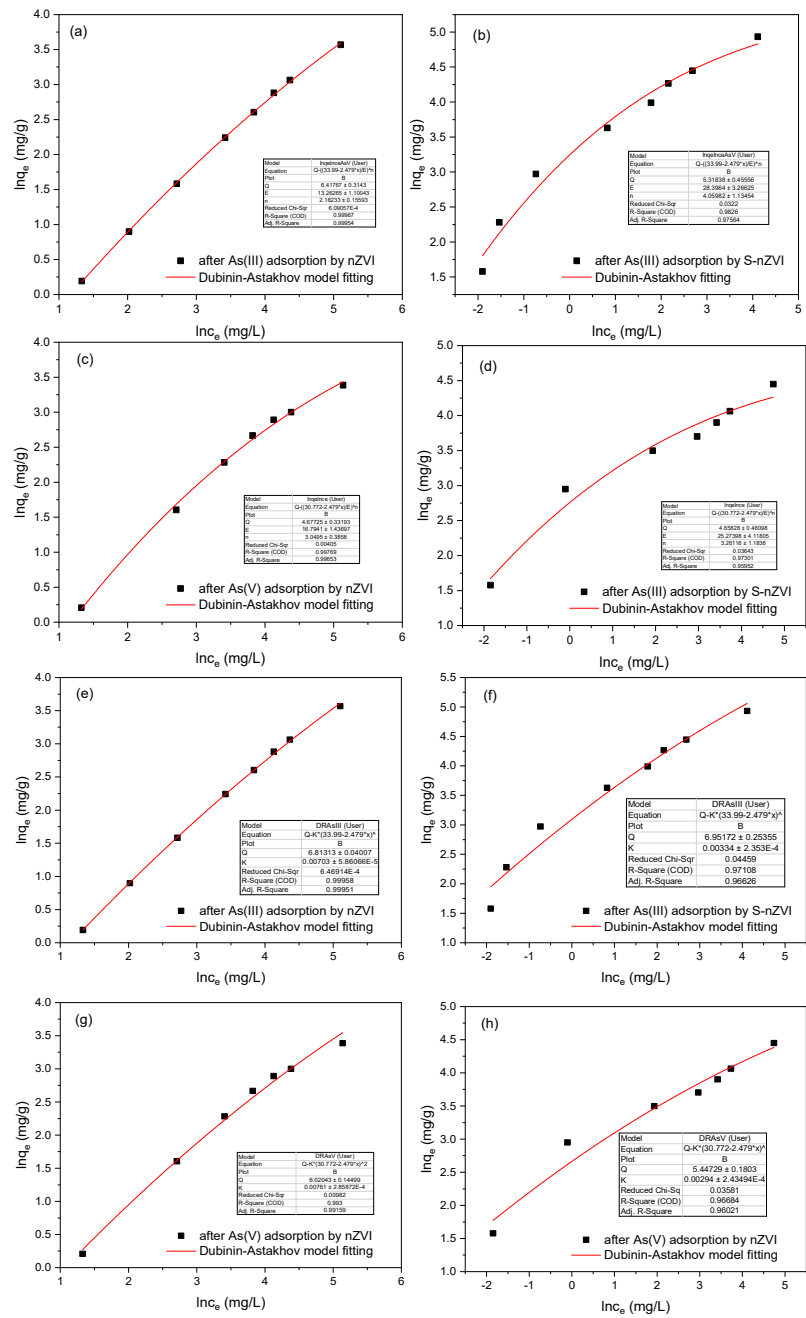

**Figure S2** The Dubinin-Astakhov model fitting results of As(III)/As(V) adsorption isotherms on nZVI and S-nZVI

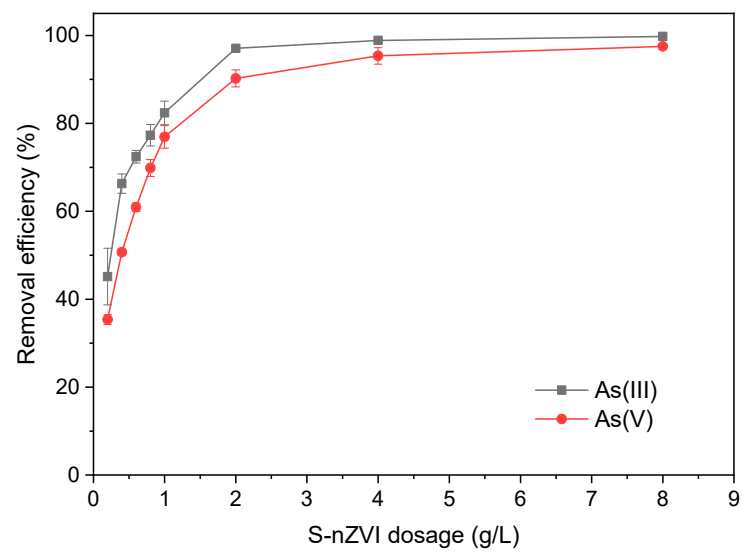

**Figure S3** Effect of S-nZVI dosage on the As(III) and As(V) removal

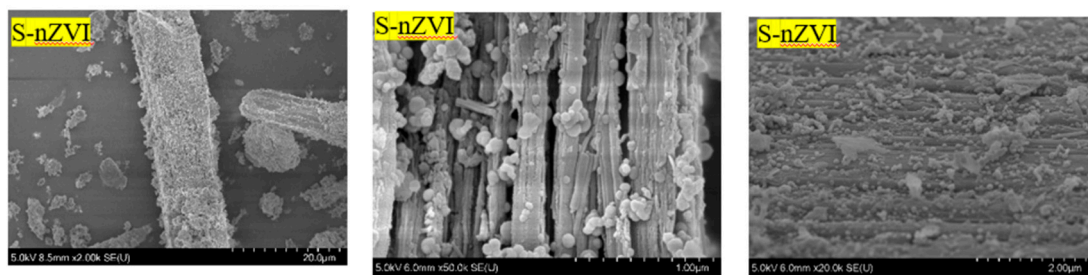

**Figure S4** SEM images of S-nZVI.

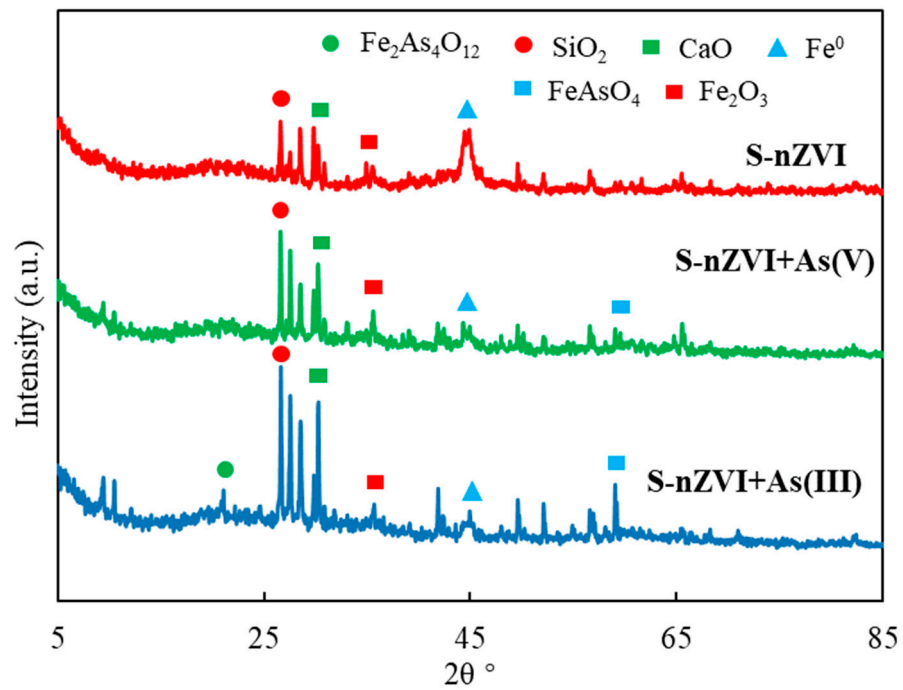

**Figure S5** XRD patterns of S-nZVI before and after adsorption of As(III) and As(V)

**Table S1** Comparison of the maximum As(III)/As(V) adsorption capacity by adsorbents reported in literatures.

| Materials               | pH  | As(III)<br>(mg/g) | As(V)<br>(mg/g) | Dosage<br>(g/L) | Reference               |
|-------------------------|-----|-------------------|-----------------|-----------------|-------------------------|
| Zeolite-nZVI            | 7.0 | 11.52             | -               | 0-30            | (Li et al., 2018)       |
| Iron oxides             | 5   | 6.77              | 7.23            | 0.5             | (Wang et al., 2013)     |
| GB-nZVI                 | 7.0 | 181.5             | -               | 0.1-0.4         | (Liu et al., 2020)      |
| Activated char and nZVI | 6.5 | 18.2              | 12.0            | 0.1-3.0         | (Zhu et al., 2009)      |
| fuller's earth-nZVI     | 7/3 | 50.08             | 91.42           | 1               | (Yadav et al., 2016)    |
| Mn-nZVI                 | 7.0 | 59.90             | 45.50           | 1               | (Bhowmick et al., 2014) |
| S-nZVI                  | 7.0 | 230.29            | 155.74          | 0.2-8           | This research           |

**Table S2** Fitting results of As(III) and As(V) adsorption on nZVI and S-nZVI by Dubinin-Astakhov model (a)-(d) and Dubinin- Radushkevich model.

|         | Dubinin-Astakhov model |           |           |       | Dubinin- Radushkevich model |           |       |
|---------|------------------------|-----------|-----------|-------|-----------------------------|-----------|-------|
|         | $\ln q_{mD-A}$         | $E_{D-A}$ | $n_{D-A}$ | $R^2$ | $\ln q_{mD-R}$              | $K_{D-R}$ | $R^2$ |
| As(III) |                        |           |           |       |                             |           |       |
| nZVI    | 6.42                   | 13.26     | 2.18      | 0.999 | 6.81                        | 0.007     | 0.999 |
| S-nZVI  | 5.32                   | 28.4      | 4.06      | 0.982 | 6.95                        | 0.003     | 0.971 |
| As(V)   |                        |           |           |       |                             |           |       |
| nZVI    | 4.68                   | 16.79     | 3.05      | 0.998 | 6.02                        | 0.008     | 0.993 |
| S-nZVI  | 4.66                   | 25.27     | 3.26      | 0.973 | 5.45                        | 0.003     | 0.967 |
